# Supplementary material for: Comparison of Placental HSD17B1 Expression and Its Regulation in Various Mammalian Species
Source: MDPI journal article supplement (doi:10.3390/ani13040622), 2023-02-10
Supplement: s1 [file s1]

**Supplementary Table S1.** Primers used in each experiment.

| PCR primers          | Forward primers             | Reverse primers            |
|----------------------|-----------------------------|----------------------------|
| <b>RT-PCR</b>        |                             |                            |
| murine Cyp11a1       | F- ttccgcttttctttagtccat    | R- gtgtctccttgatgctggcttt  |
| murine Hsd3b1        | F- actgcaggaggtcagagct      | R- gccagtaacacacagaatacc   |
| murine Hsd3b6        | F- tctggaggagatcagggtc      | R- gcccgtaacaccgagaatatt   |
| murine Cyp17a1       | F- aaataataacactggggaaggc   | R- tgggtgtgggtgtaatgagatgg |
| murine Cyp19a1       | F- tcaataccaggctcctggcta    | R- gtatgcactgattcacgttc    |
| murine Hsd17b1       | F- actgtgccagcaagttgcgc     | R- aagcggctcgtggagaagtag   |
| murine Gapdh         | F- accacagtccatgccatcac     | R- tccaccacctgttgctgta     |
| guinea pig Cyp11a1   | F- ttgagtcacacacaaatgtca    | R- tggcctgaatgttctcatagg   |
| guinea pig Hsd3b     | F- atcgtccacttgttggtgaag    | R- ctcatgtgttcttgacgat     |
| guinea pig Cyp17a1   | F- tgcattgatctgcttcagtgtc   | R- tgcattgatctgcttcagtgtc  |
| guinea pig Cyp19a1   | F- gcacagcagagaaattggaag    | R- caccaggacgactttcatcat   |
| guinea pig Hsd17b1   | F- actgtgcaagcaagttgcgc     | R- aagcgtcgtgagagaagtag    |
| guinea pig Gapdh     | F- accacagtccatgccatcac     | R- tccaccacctgttgctgta     |
| ovine CYP11A1        | F- gtgtctcaggacttcgtcagc    | R- ccatctcgtacaagtgcact    |
| ovine HSD3B1         | F- tgggtgtggaggagaaggatctg  | R- tgggtaccttcacattgacgttc |
| ovine CYP17A1        | F- tcctgtcagacaacaaaagg     | R- cacaaccttcattctttcca    |
| ovine CYP19A1        | F- gtccgaagttgtgcctattgcagc | R- cctccaacctgtccagatgctgg |
| ovine HSD17B1        | F- ttgtgcgagagctggtgcattct  | R- aggaatcgtcgtggtgaagta   |
| bovine CYP11A1       | F- gtgtctcaggacttcgtcagc    | R- ccatctcgtacaagtgcatt    |
| bovine HSD3B1        | F- tgggtgtggaggagaaggatctg  | R- tgggtaccttcacattgacgttc |
| bovine CYP17A1       | F- tcctgtcagacaacaaaagg     | R- cacaaccttcattctttcca    |
| bovine CYP19A1       | F- aagccttagaggatgatgtc     | R- ggtctcgtcgtgatgaagg     |
| bovine HSD17B1       | F- ttgtgcgagagctggtgcattct  | R- aggaatcgtcgtggtgaagta   |
| bovine GAPDH         | F- tgtccagtattgattccacc     | R- tccaccacctgttgctgta     |
| human CYP11A1        | F- tagtgtctccttgatgctgg     | R- gaaaggaagtgttcaccacg    |
| human HSD3B1         | F- tggaatctgaaaaacggcggc    | R- tgagcttggtccctgtcact    |
| human HSD3B2         | F- tggaatctaaaaatggtgat     | R- tgggtgtgtccctgttgcc     |
| human CYP17A1        | F- gaaggcatcatagacaacctga   | R- acattctggtcaatctcctgt   |
| human CYP19A1        | F- ctggaagaatgtatggactt     | R- gatcatttcagcatgtttt     |
| human HSD17B1        | F- atgacgtttattgcgccagc     | R- ccggaacgtcgccgaacactt   |
| human $\beta$ -actin | F- gggaaatcgtgcgtgacattaag  | R- tgtgttggtgacaggtctttg   |
| <b>Bisulfite</b>     |                             |                            |
| ovine HSD17B1        | F- gatataataaagggtgggga     | R- ataataataaccactatac     |

## (A) mouse

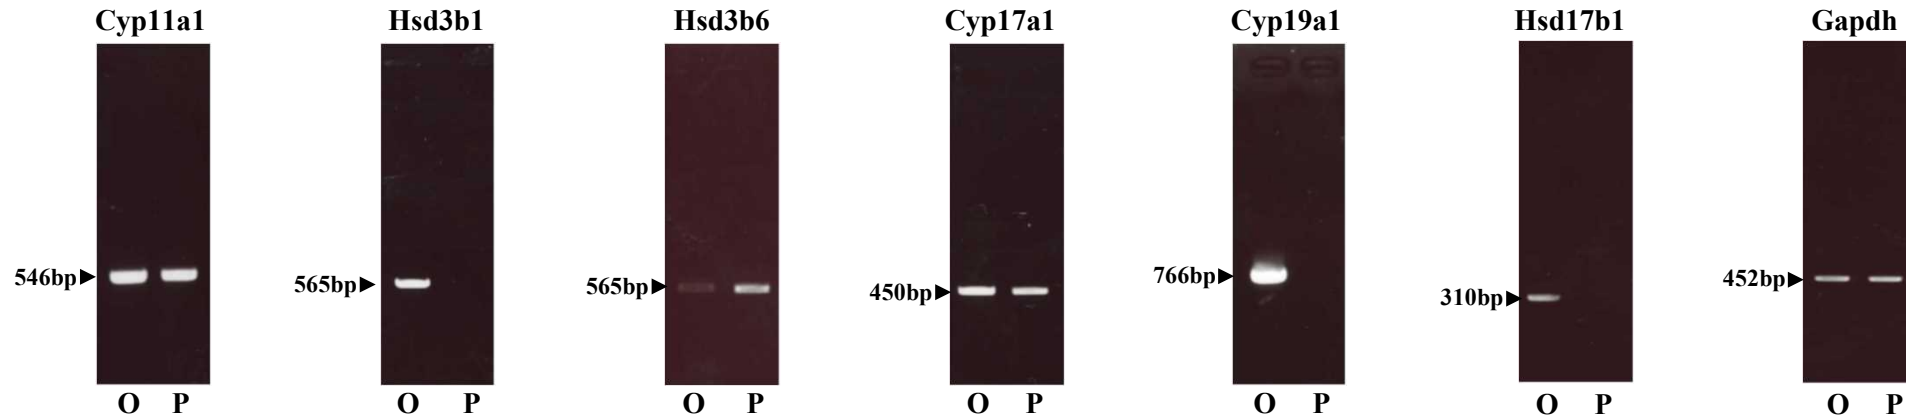

## (B) Guinea pig

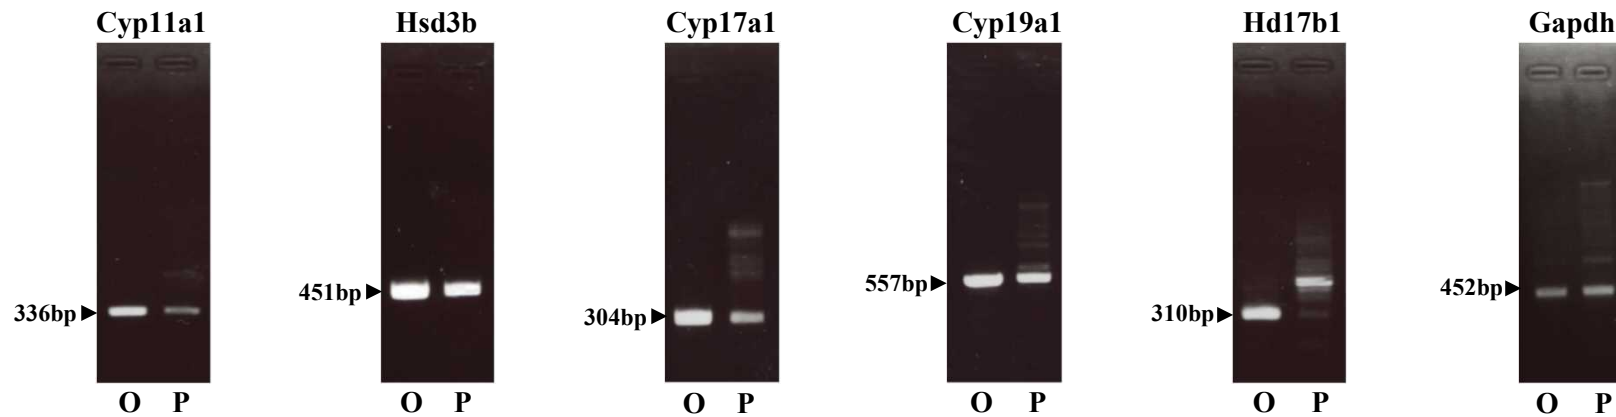

**Figure S1. The whole images of RT-PCR analyses in Figure 2.**  
Lanes O and P represent an ovary and placenta, respectively.

### (C) Porcine

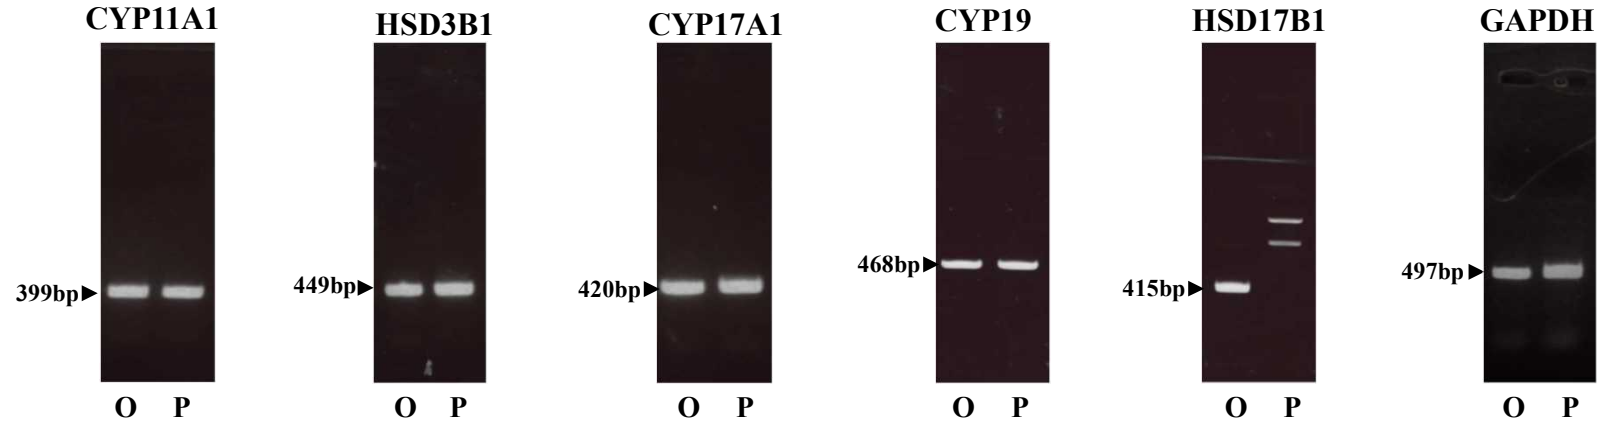

### (D) Ovine

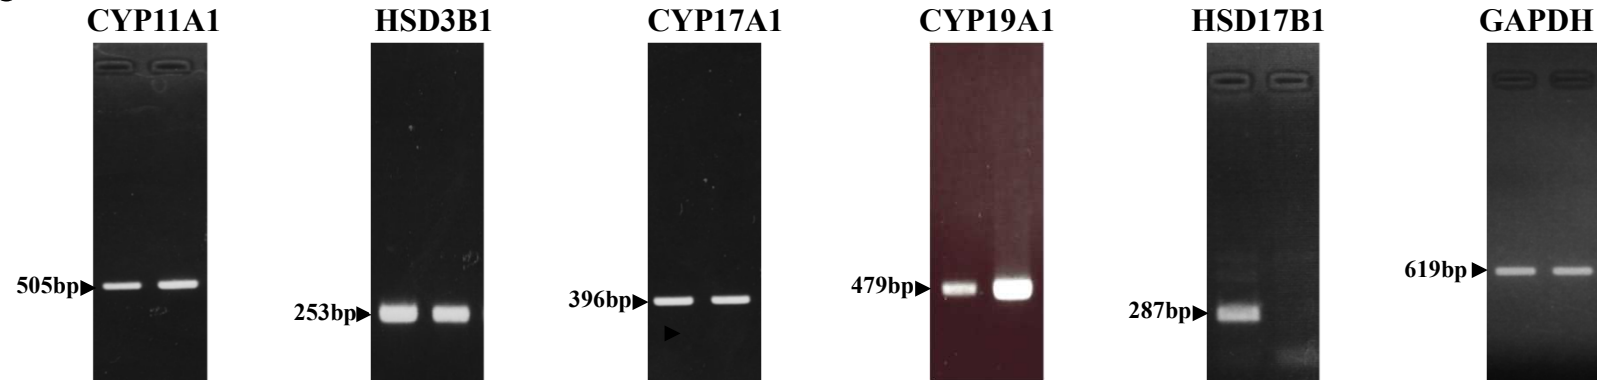

**Figure S1. The whole images of RT-PCR analyses in Figure 2 (continued).**  
Lanes O and P represent an ovary and placenta, respectively.

## (E) Bovine

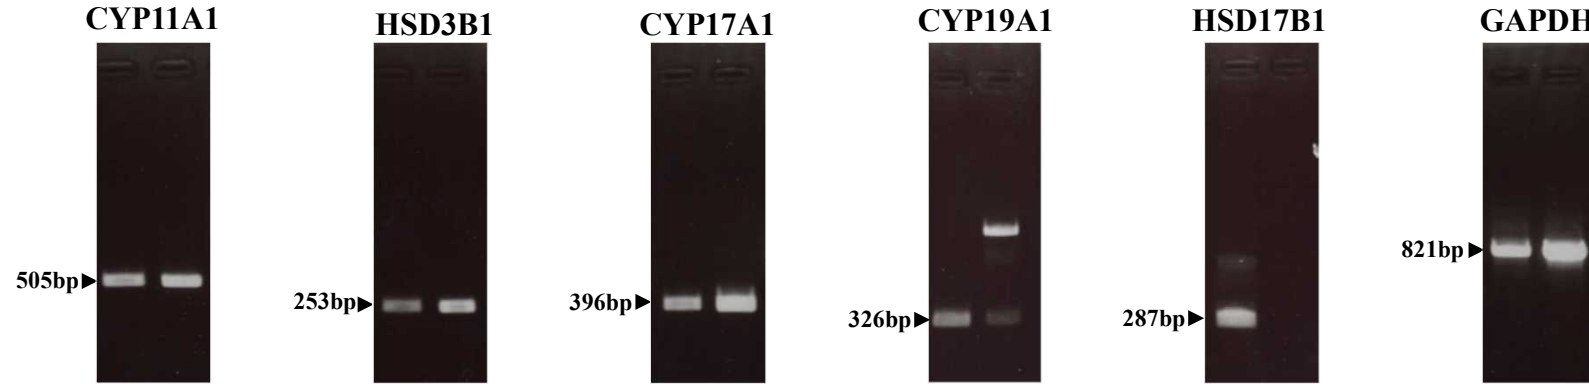

## (F) human

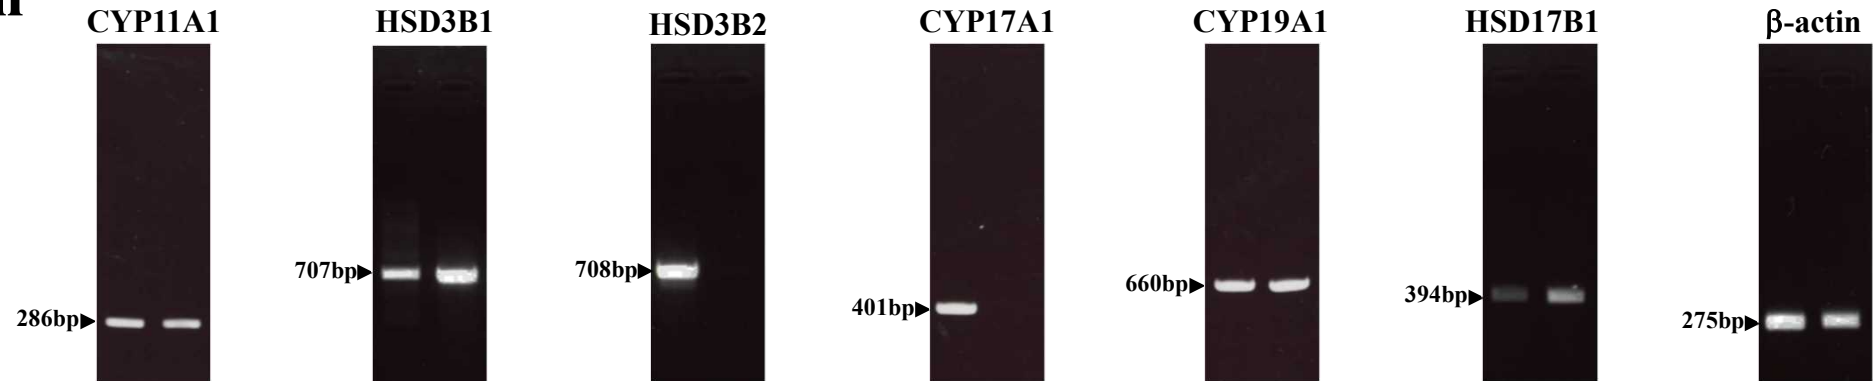

**Figure S1. The whole images of RT-PCR analyses in Figure 2 (continued).**  
Lanes O and P represent an ovary and placenta, respectively.

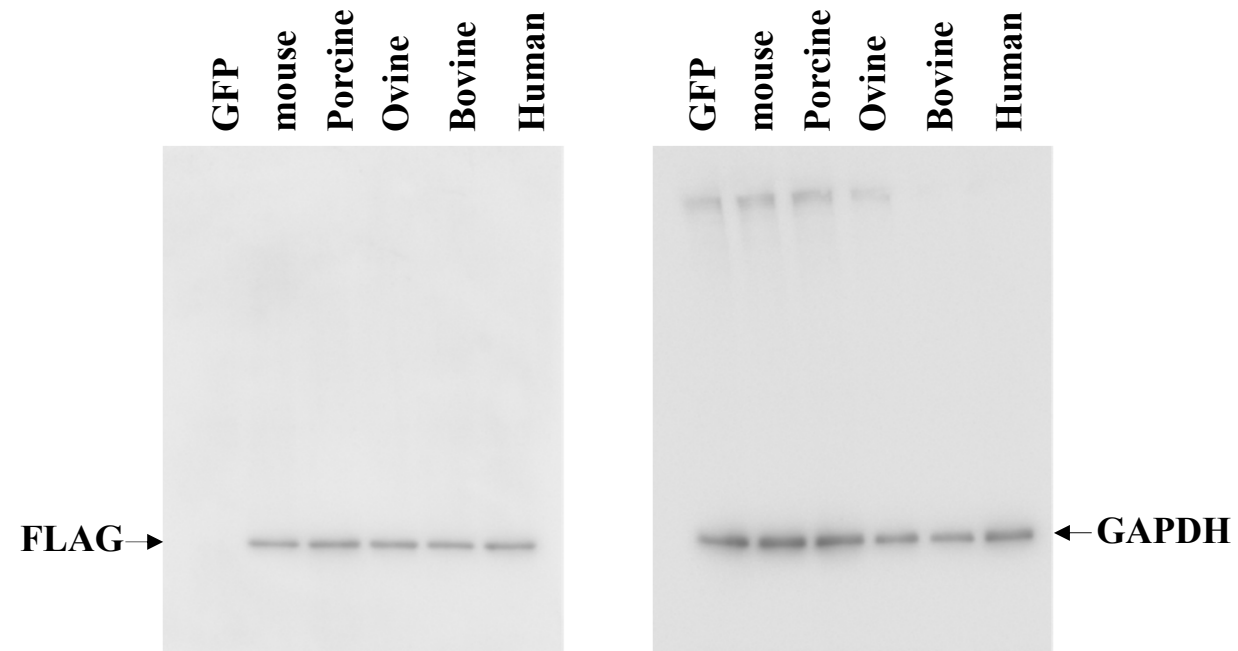

**Figure S2. The whole images of western blot analyses in Figure 4(A).**
